# Supplementary material for: Gene Expression Control by Glucocorticoid Receptors during Innate Immune Responses
Source: PubMed Central journal article supplement (PMC4835445; doi:10.3389/fendo.2016.00031), 2016-04-19
Supplement: Table_1.pdf [file Table_1.pdf]

| Cell Type (Analysis)                                    | Agonist                              | Main Findings                                                                                                                                                                                        | References                                            |
|---------------------------------------------------------|--------------------------------------|------------------------------------------------------------------------------------------------------------------------------------------------------------------------------------------------------|-------------------------------------------------------|
| Monocytes (Microarray)                                  | Fluticasone propionate               | Down-regulation of anti-inflammatory genes CXCL11, CCL5, FCN1 (Ficolin).<br><br>Up-regulation of IL-10, IL-1RII and MRC1 genes.                                                                      | (Ehrchen et al., 2016)                                |
| Macrophages (Microarray)                                | Dexamethasone<br><br>LPS stimulation | Down-regulation of Pro-inflammatory genes IL-1 $\alpha$ , IL-8, IFN- $\alpha$ , and IFN- $\beta$ .<br><br>Increased expression of scavenger receptors.                                               | (Boettner, Ehrhart-bornstein, & Shea, 2002)           |
| Dendritic Cells (Microarray)                            | Dexamethasone<br><br>LPS stimulation | Down-regulation of Pro-inflammatory genes IL-2, CCR7.                                                                                                                                                | (Vizzardelli et al., 2006)                            |
| Mastocytes (Microarray)                                 | Dexamethasone                        | Up-regulation of MKP-1 gene contributing to anti-inflammatory effects.                                                                                                                               | (Kassel et al., 2001)                                 |
| PBMCs - Peripheral Blood Mononuclear Cells (Proteomics) | Dexamethasone<br><br>LPS stimulation | Down-regulation of Pro-inflammatory genes MICAL3, IL-1 $\alpha$ , IL-1 $\beta$ , IL-6 and IL-8.<br><br>Up-regulation of M130, fibroleukin and metalloproteinase 2 genes (anti-inflammatory effects). | (Bileck, Kreutz, Muqaku, Slany, & Gerner, 2014)       |
| Neutrophils (Proteomics)                                | Dexamethasone                        | Down-regulation of annexin 1 (lipocortin 1), phosphoglycerate mutase and cathelicidin 1 genes.<br><br>Up-regulation of Lactotransferrin (lactoferrin) contributing to Pro-inflammatory effects.      | (Beveridge, Mitchell, Brewer, Clark, & Caswell, 2008) |

|                                           |               |                                                                                                                                                          |                       |
|-------------------------------------------|---------------|----------------------------------------------------------------------------------------------------------------------------------------------------------|-----------------------|
| Epithelial Cells<br>(Microarray)          | Dexamethasone | Up-regulation of MKP-1 gene contributing to anti-inflammatory effects.                                                                                   | (Wu et al., 2004)     |
| THP1- Monocytic Cell Line<br>(Microarray) | Org 214007-0  | Down-regulation of IL-6, IL-8 and MCP-1 genes.<br><br>Up- regulation of FK506, GILZ and DUSP1 genes.                                                     | (Lierop et al., 2012) |
| Neutrophils<br>(Microarray)               | Dexamethasone | Down-regulation of Caspase-8,TF-1 and TFAR-19 genes, contributing to anti-apoptotic effects.<br><br>Up-regulation of PPAR- $\gamma$ , BPI and LC3 genes. | (Weber et al., 2006)  |

Supplementary Table 1 – Summary of published Microarray/Proteomics data from studies employing different immune cells and the indicated GR agonists.

## References

- Beveridge, J. D., Mitchell, G. B., Brewer, D., Clark, M. E., & Caswell, J. L. (2008). Altered protein expression in neutrophils of calves treated with dexamethasone. *Canadian Journal of Veterinary Research*, 72(519), 249–252.
- Bileck, A., Kreutz, D., Muqaku, B., Slany, A., & Gerner, C. (2014). Comprehensive Assessment of Proteins Regulated by Dexamethasone Reveals Novel Effects in Primary Human Peripheral Blood Mononuclear Cells. *Journal of Proteome Research*, 2(i), 5989–6000.
- Boettner, A., Ehrhart-bornstein, M., & Shea, J. J. O. (2002). Gene profiling reveals unknown enhancing and suppressive actions of glucocorticoids on immune cells. *FASEB Journal*, 1(16), 61–71.
- Ehrchen, J., Steinmu, L., Barczyk, K., Tenbrock, K., Nacken, W., Eisenacher, M., ... Roth, J. (2016). Glucocorticoids induce differentiation of a specifically activated, anti-inflammatory subtype of human monocytes. *Blood Journal*, 109(3), 1265–1275. <http://doi.org/10.1182/blood-2006-02-001115>.The
- Kassel, O., Sancono, A., Kra, È., Kreft, B., Stassen, M., & Cato, A. C. B. (2001). Glucocorticoids inhibit MAP kinase via increased expression and decreased degradation of MKP-1. *The EMBO Journal*, 20(24), 7108–7116.
- Lierop, C. Van, Alkema, W., Laskewitz, A. J., Dijkema, R., Der, H. M. Van, Smit, M. J., ... Dokter, W. H. A. (2012). Org 214007-0 : A Novel Non-Steroidal Selective Glucocorticoid Receptor Modulator with Full Anti- Inflammatory Properties and Improved Therapeutic Index. *Plos One*, 7(11). <http://doi.org/10.1371/journal.pone.0048385>

- Vizzardelli, C., Pavelka, N., Luchini, A., Zanoni, I., Bendickson, L., Pelizzola, M., ... Nilsen-hamilton, M. (2006). Effects of dexamethazone on LPS-induced activation and migration of mouse dendritic cells revealed by a genome-wide transcriptional analysis. *European Journal of Immunology*, *36*, 1504–1515. <http://doi.org/10.1002/eji.200535488>
- Weber, P. S. D., Madsen-Bouterse, S. A., Rosa, G. J. M., Sipkovsky, S., Ren, X., Almeida, P. E., ... Burton, J. L. (2006). Analysis of the bovine neutrophil transcriptome during glucocorticoid treatment. *Physiological Genomics*, *28*(1), 97–112. <http://doi.org/10.1152/physiolgenomics.00094.2006>
- Wu, W., Chaudhuri, S., Brickley, D. R., Pang, D., Karrison, T., & Conzen, S. D. (2004). Microarray Analysis Reveals Glucocorticoid-Regulated Survival Genes That Are Associated With Inhibition of Apoptosis in Breast Epithelial Cells. *Cancer Research*, *64*, 1757–1764.
